# Supplementary material for: Scalable approach towards specific and ultrasensitive cation sensing under harsh environmental conditions by engineering the analyte–transducer interface
Source: Royal Society of Chemistry journal article supplement (doi:10.1039/d0na01042a), 2021-01-01
Supplement: d0na01042a1.pdf [file d0na01042a1.pdf]

**Scalable approach towards specific and ultrasensitive cation sensing in harsh environmental conditions by engineering the analyte-transducer interface**

Sudeshna Mondal,<sup>a</sup> Chandramouli Subramaniam<sup>a</sup>

<sup>a</sup> Department of Chemistry, Indian Institute of Technology Bombay, Powai, Mumbai 400076, India.

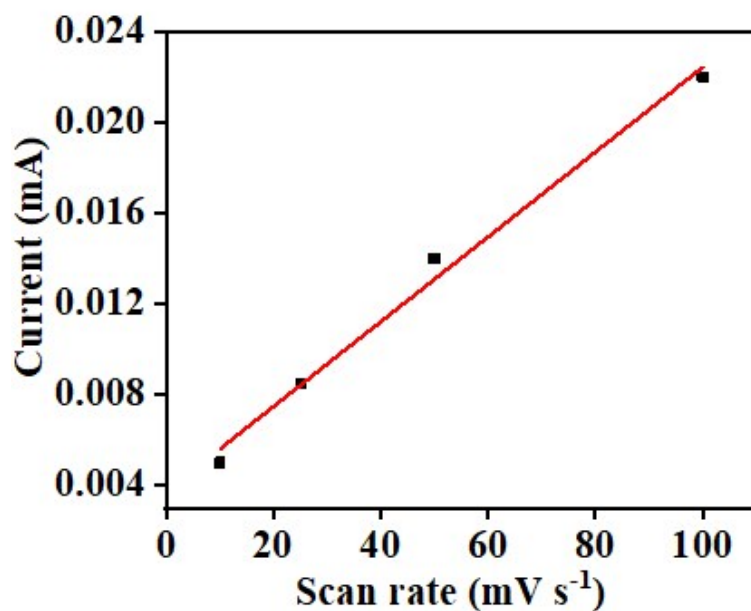

Figure S1. Randles Sevcik plot showing characteristics of an ideally polarized electrode with CNT-thread.

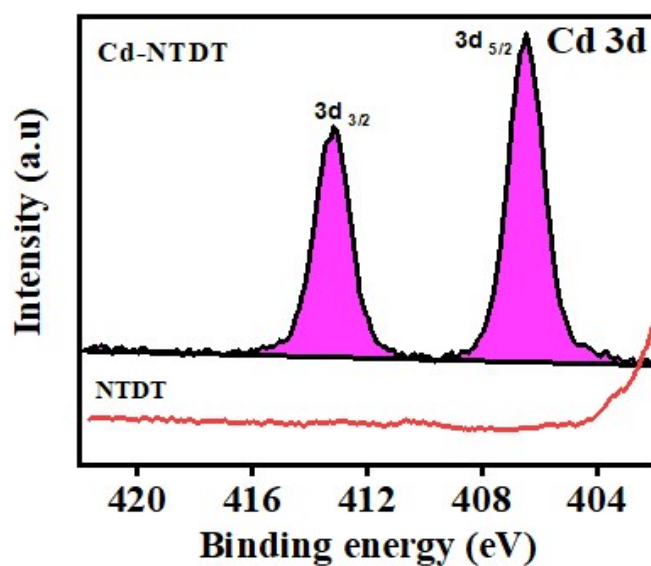

Figure S2. XPS spectra of Cd 3d in Cd-NTDT before and after addition of 10 ppm of Cd<sup>2+</sup>.

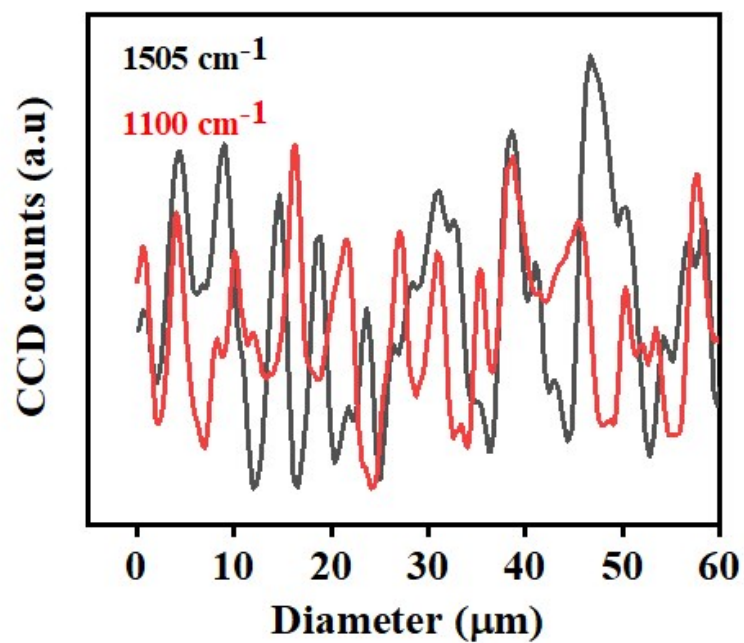

Figure S3. Line intensity profile of  $\nu_{\text{bending}}(\text{N-H})$  at  $1505\text{ cm}^{-1}$  and  $\nu_{\text{stretching}}(\text{C-C})$  at  $1100\text{ cm}^{-1}$  of K-Valinomycin ionophore membrane as obtained from Raman spectral mapping.

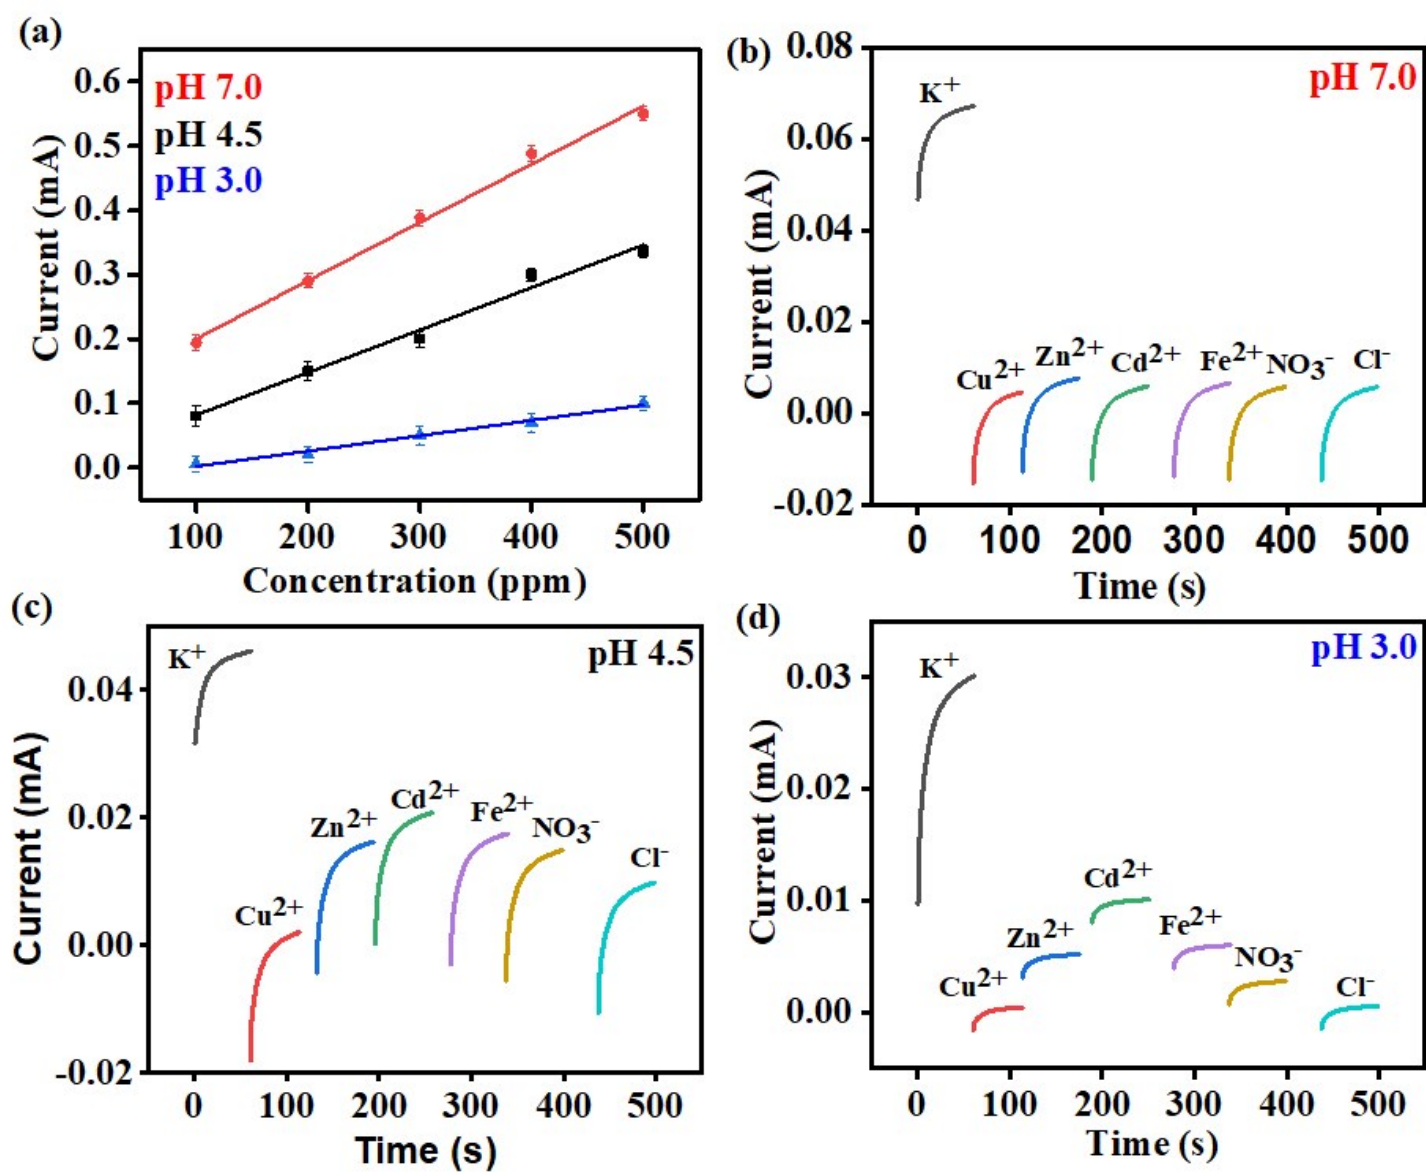

Figure S4. (a) Chronoamperometric studies of  $K^+$  at different pH and concentrations ranging from 100 ppm-500 ppm. Selectivity studies on the  $K^+$  sensor at (b) pH 7.0, (c) pH 4.5 and (c) pH 3.0.

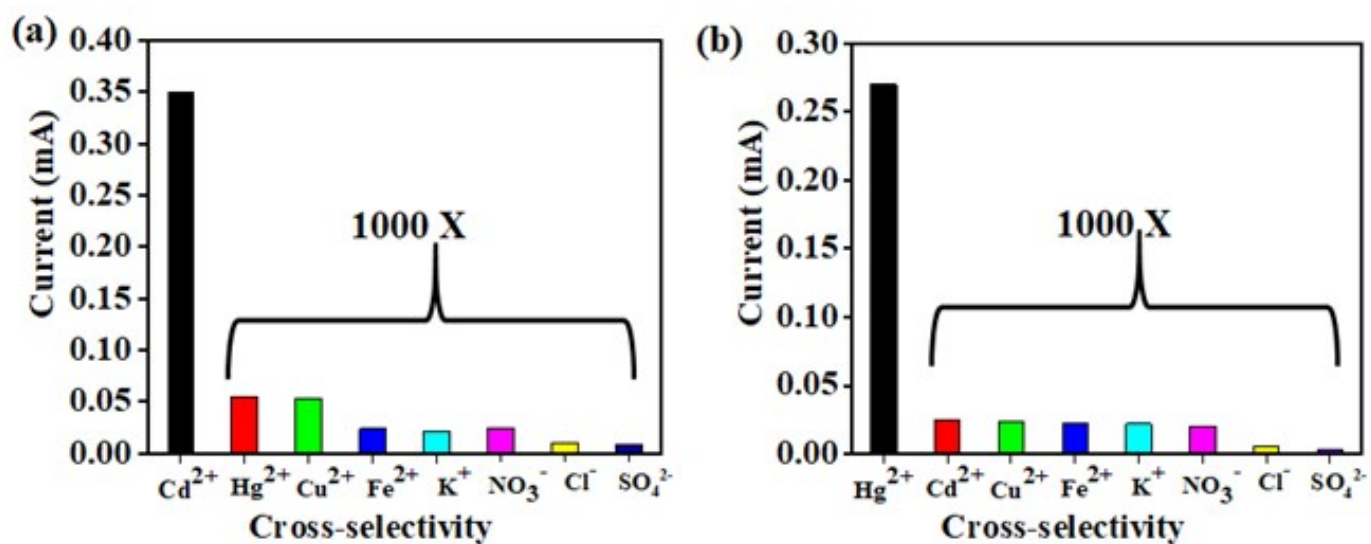

Figure S5. (a) Selectivity studies on the Cd<sup>2+</sup> sensor in presence of 1000 times excess concentrations of counter ions. (b) Selectivity studies on the Hg<sup>2+</sup> sensor in presence of 1000 times excess concentrations of counter ions.

**Table S1. Analytical characteristics of point-of-care electrochemical platforms for detection of K<sup>+</sup>, Cd<sup>2+</sup> and Hg<sup>2+</sup>**

| <b>Electrode (K<sup>+</sup>)</b>   | <b>Type of transduction</b> | <b>Linear range (ppm)</b> | <b>Limit of detection (ppm)</b> | <b>Response time (s)</b> | <b>Reference</b>    |
|------------------------------------|-----------------------------|---------------------------|---------------------------------|--------------------------|---------------------|
| Textile/polyurethane/<br>CNTs      | solid-contact               | 10- 10 <sup>4</sup>       | 1                               | 5                        | 1                   |
| CNTs/ cotton                       | solid-contact               | 10-10 <sup>4</sup>        | 10                              | 60                       | 2                   |
| Carbon/PEDOT/PET                   | solid-contact               | 10-10 <sup>4</sup>        | 0.01                            | -                        | 3                   |
| Adhesive carbon tape               | Inner solution              | 100-10 <sup>4</sup>       | 0.039                           | 5                        | 4                   |
| <b>Valinomycin- IM</b>             | <b>solid contact</b>        | <b>10 – 500</b>           | <b>30</b>                       | <b>10</b>                | <b>Present work</b> |
| <b>Electrode (Cd<sup>2+</sup>)</b> | <b>Type of transduction</b> | <b>Linear range (ppb)</b> | <b>Limit of detection (ppb)</b> | <b>Response time (s)</b> | <b>Reference</b>    |
| Au/Ti-RGO                          | solid contact               | 1.0-120                   | 1.0                             | -                        | 5                   |
| Paper strip/SWNTs/ P3OT            | solid contact               | -                         | 0.13                            | -                        | 6                   |
| RGO/CNT/Bi                         | solid contact               | 20 -200                   | 0.6                             | -                        | 7                   |
| <b>NTDT-IM</b>                     | <b>solid contact</b>        | <b>0.1 -2.5</b>           | <b>0.12</b>                     | <b>10</b>                | <b>Present work</b> |
| <b>Electrode (Hg<sup>2+</sup>)</b> | <b>Type of transduction</b> | <b>Linear range (ppb)</b> | <b>Limit of detection (ppb)</b> | <b>Response time (s)</b> | <b>Reference</b>    |
| CNT-thread                         | solid contact               | 300-1200                  | 0.2                             | 120                      | 8                   |
| EDTAPANI/MWCNTs/SPCE               | solid contact               | 0-2.0                     | 0.003                           | -                        | 9                   |
| Au/PET                             | solid contact               | 0-300                     | -                               | 120                      | 10                  |
| <b>NDDC6-IM</b>                    | <b>solid contact</b>        | <b>0.1-2.5</b>            | <b>0.10</b>                     | <b>10</b>                | <b>Present work</b> |

## References

1. M. Parrilla, R. Cánovas, I. Jeerapan, F. J. Andrade, J. Wang, *Adv Healthc Mater.* 2016, 5(9), 996-1001.
2. T. Guinovart, M. Parrilla, A. G Crespo, F. X Rius, F. J. Andrade, *Analyst* 2013, **138**, 5208–5215.
3. A. Alizadeh, A. Burns, R. Lenigk, R. Gettings, J. Ashe, A. Porter, M. McCaul, R. Barrett, D. Diamond, P. White, P. Skeath, M. Tomczak, *Lab Chip* 2018, **18**, 2632–2641.
4. A. A. Stekolshchikova, A. V. Radaev, O. Y. Orlova, K. G. Nikolaev, E. V. Skorb, *ACS Omega* 2019, **4**, 15421–15427.
5. X. Xuan, M. F. Hossain, J. Y Park, *Sci. Rep.* 2016, **6**, 33125.
6. S. T. Mensah, Y. Gonzalez, P. Calvo-Marzal, K. Y. Chumbimuni-Torres, *Anal. Chem.* 2014, **86**, 7269–7273.
7. X. Xuan, J.Y. Park, *Sens. Actuat. B-Chem* 2018, **255**, 1220–1227.
8. D. Zhao, D. Siebold, N.T. Alvarez, V. N. Shanov, W. R. Heineman, *Anal. Chem.* 2017, **89**, 9654–9663.
9. Y. Zhao, X. Yang, P. Pan, J. Liu, Z. Yang, J. Wei, W. Xu, Q. Bao, H. Zhang, Z. Liao, *J. Electron. Mater.* 2020, **49**, 6695-6705.
10. W. Gao, H. Y. Y. Nyein, Z. Shahpar, H. M. Fahad, K. Chen, S. Emaminejad, Y. Gao, L. Tai, H. Ota, E. Wu, J. Bullock, Y. Zeng, D. Lien, A. Javey, *ACS Sens.* 2016, **1**, 866–874.
